# Supplementary material
Source: Elsevier journal article supplement (https://www.sciencedirect.com/science/article/pii/S217357271730036X)
Supplement: mmc1 [file S217357271730036X:mmc1.doc]

1. [{(ANNEX)}] List of investigators of the Pediatric Transport Study Group

Boris Brandstrup Azuero, María Cabrerizo Ortiz, Ángel Carrillo, Sara de la Mata Navazo, Jimena del Castillo, Pedro Domínguez Sampedro, María Escobar Castellanos, Sarah Fernández Lafever, Marta Gómez García, Rafael González, Jorge López González, Jesús López-Herce Cid, María José Solana García, Javier Urbano Villaescusa.

1. [{(Annex 1)}] Additional material

*Encuesta iberoamericana de transporte pediátrico datos generales del informador* <doi:10.1016/j.medin.2015.12.013>.

1. [{(Annex A)}] Supplementary material

mmc1
